# Supplementary material for: Inhibition studies of Helicobacter pylori urease with Schiff base copper(ii) complexes
Source: Royal Society of Chemistry journal article supplement (doi:10.1039/c6ra00500d), 2016-01-01
Supplement: c6ra00500d1.pdf [file c6ra00500d1.pdf]

Supplementary material

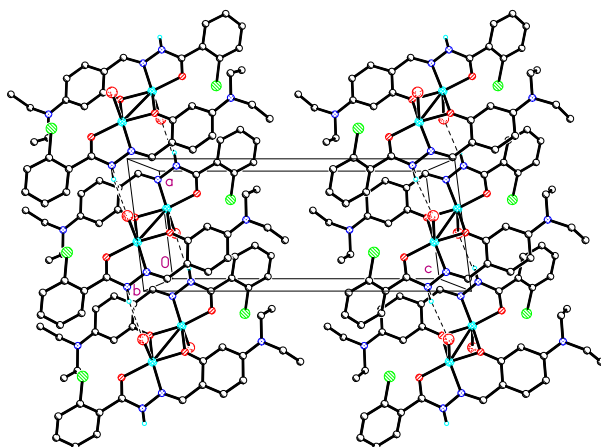

Figure S1. Molecular packing diagram of **1**, viewed along *b* axis. Hydrogen bonds are shown as dashed lines.

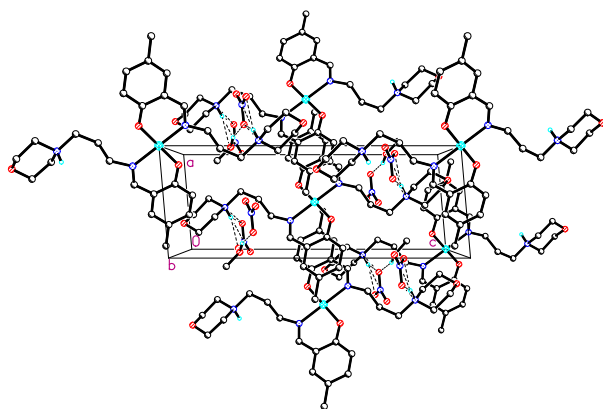

Figure S2. Molecular packing diagram of **2**, viewed along *b* axis. Hydrogen bonds are shown as dashed lines.

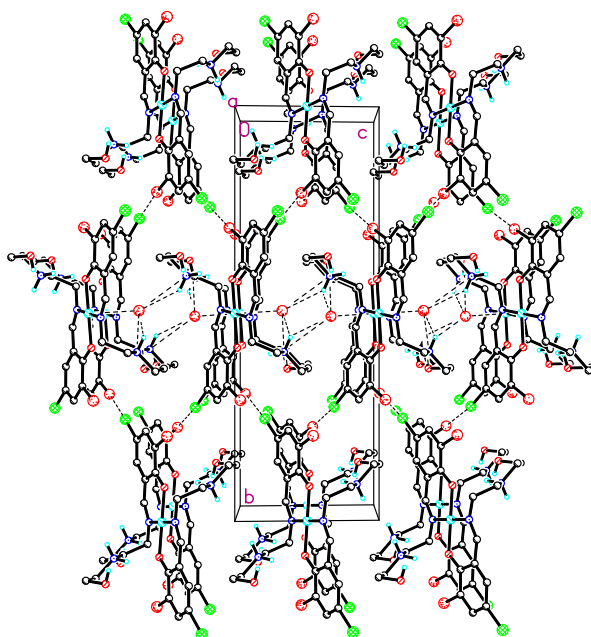

Figure S3. Molecular packing diagram of **3**, viewed along *a* axis. Hydrogen bonds are shown as dashed lines.

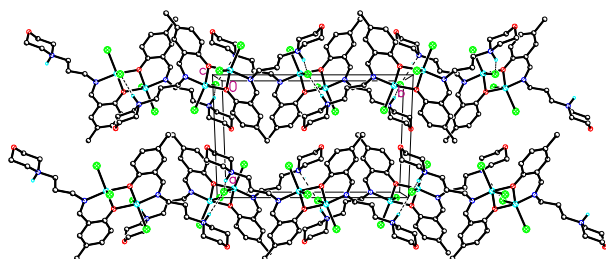

Figure S4. Molecular packing diagram of **5**, viewed along *c* axis. Hydrogen bonds are shown as dashed lines.

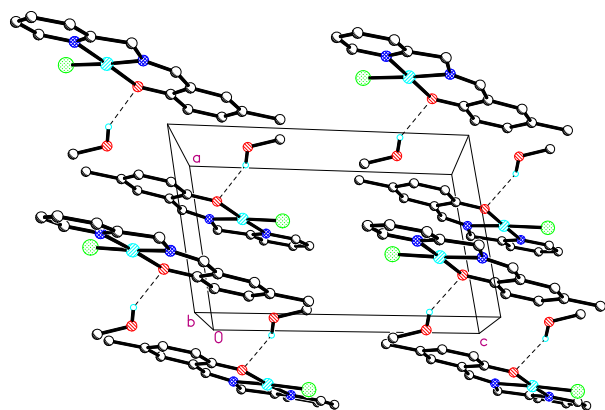

Figure S5. Molecular packing diagram of **8**, viewed along *b* axis. Hydrogen bonds are

shown as dashed lines.

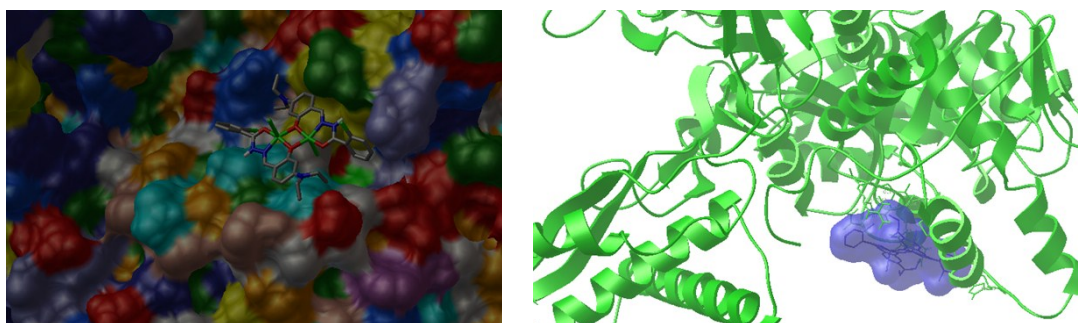

Figure S6. Binding mode of **1** with *Helicobacter pylori* urease. Left: The enzyme is shown as surface, and the complex is shown as sticks. Right: The enzyme is shown as ribbons, and the complex is shown as sticks.

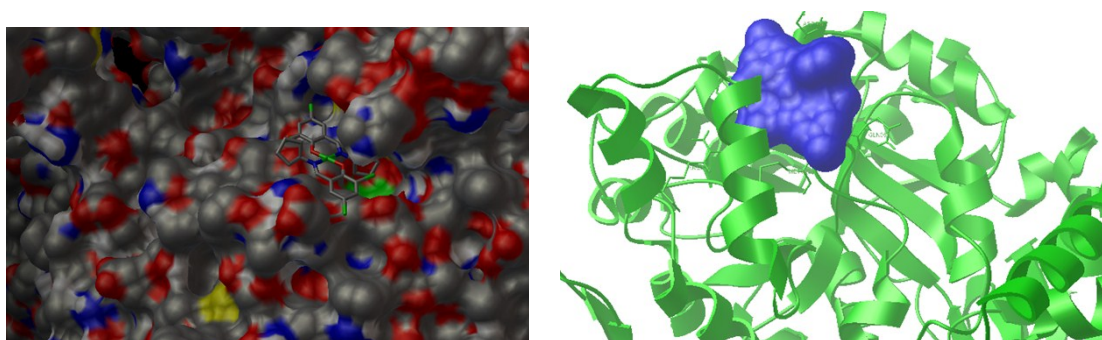

Figure S7. Binding mode of **4** with *Helicobacter pylori* urease. Left: The enzyme is shown as surface, and the complex is shown as sticks. Right: The enzyme is shown as ribbons, and the complex is shown as sticks.

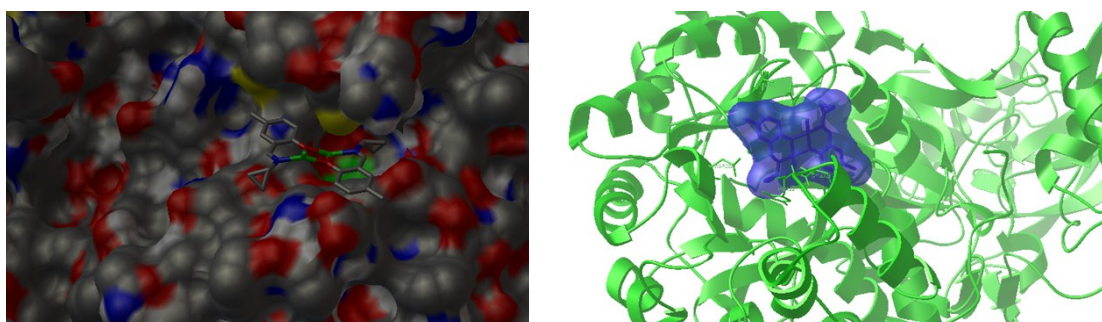

Figure S8. Binding mode of **6** with *Helicobacter pylori* urease. Left: The enzyme is shown as surface, and the complex is shown as sticks. Right: The enzyme is shown as

ribbons, and the complex is shown as sticks.

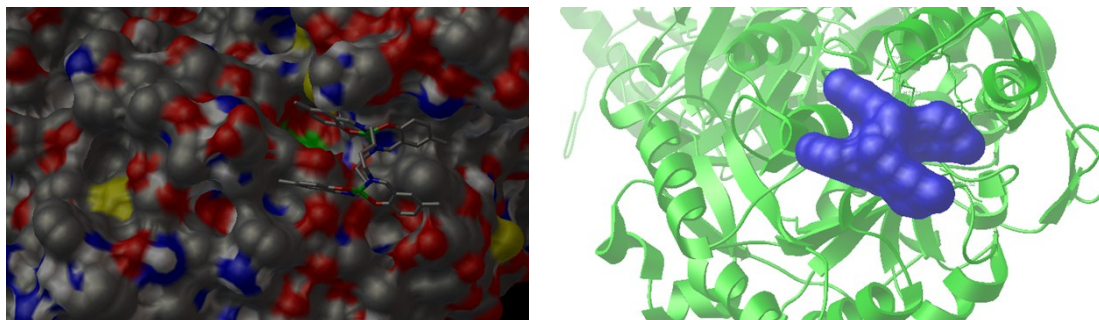

Figure S9. Binding mode of **9** with *Helicobacter pylori* urease. Left: The enzyme is shown as surface, and the complex is shown as sticks. Right: The enzyme is shown as ribbons, and the complex is shown as sticks.
